# Supplementary material
Source: Springer Nature journal article supplement (https://www.springermedizin.de/resource/supplementary/12885_2012_3520_MOESM3_ESM.pdf/9463670)

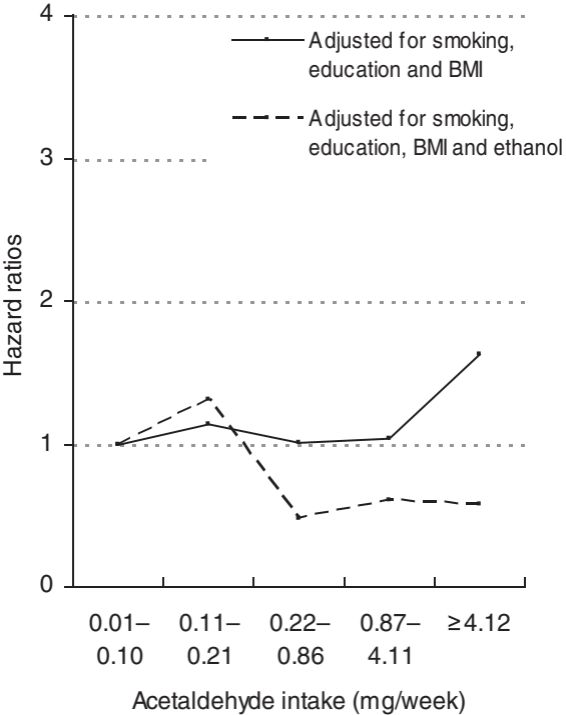

Supplement: MOESM3 [file 9463670]
